# Supplementary material
Source: HighWire-hosted journal article supplement (https://www.rcpjournals.org/highwire/filestream/11632/field_highwire_adjunct_files/1/Bennett_Supplementary_material_S2.pdf)
Supplement: Bennett_Supplementary_material_S2.pdf [file Bennett_Supplementary_material_S2.pdf]

## ADR Checklist

|    | System                 | Symptom                                                      | Troublesome for patient? 1 = Yes, 0 = No, or improved (second visit only) |              |
|----|------------------------|--------------------------------------------------------------|---------------------------------------------------------------------------|--------------|
|    |                        |                                                              | First visit                                                               | Second visit |
| 1  | Cardiovascular         | Orthopnoea / Paroxysmal nocturnal dyspnoea                   |                                                                           |              |
| 2  |                        | Dizziness / Orthostatic blood pressure drop                  |                                                                           |              |
| 3  |                        | <i>Collapses, falls or episodes of Loss of Consciousness</i> |                                                                           |              |
| 4  |                        | Peripheral oedema                                            |                                                                           |              |
| 5  |                        | Palpitations                                                 |                                                                           |              |
| 6  | Respiratory            | Dyspnoea                                                     |                                                                           |              |
| 7  |                        | Pharyngolaryngeal pain / nasopharyngitis                     |                                                                           |              |
| 8  |                        | Epistaxis                                                    |                                                                           |              |
| 9  |                        | Cough                                                        |                                                                           |              |
| 10 | Gastrointestinal       | Constipation                                                 |                                                                           |              |
| 11 |                        | Diarrhoea                                                    |                                                                           |              |
| 12 |                        | Nausea / vomiting                                            |                                                                           |              |
| 13 |                        | Generalised abdominal pain                                   |                                                                           |              |
| 14 |                        | Dyspepsia                                                    |                                                                           |              |
| 15 |                        | Dry mouth                                                    |                                                                           |              |
| 16 |                        | Taste disturbance                                            |                                                                           |              |
| 17 |                        | Appetite                                                     |                                                                           |              |
| 18 | Neurological / sensory | Memory problems                                              |                                                                           |              |
| 19 |                        | Headache                                                     |                                                                           |              |
| 20 |                        | Aggression                                                   |                                                                           |              |
| 21 |                        | Fatigue                                                      |                                                                           |              |
| 22 |                        | Somnolence                                                   |                                                                           |              |
| 23 |                        | Aesthenia                                                    |                                                                           |              |
| 24 |                        | Hearing disturbance                                          |                                                                           |              |
| 25 |                        | Visual disturbance                                           |                                                                           |              |
| 26 |                        | Tremor                                                       |                                                                           |              |
| 27 |                        | Paraesthesia                                                 |                                                                           |              |
| 28 | Other                  | Myalgia / arthralgia                                         |                                                                           |              |
| 29 |                        | Itching/rashes                                               |                                                                           |              |
| 30 |                        | Sleep disturbance                                            |                                                                           |              |
| 31 |                        | Mood disturbance                                             |                                                                           |              |
| 32 |                        | <i>Psychological issues with pill burden*</i>                |                                                                           |              |
|    |                        |                                                              |                                                                           |              |
| 33 |                        | <i>General health status*</i>                                |                                                                           |              |
| 34 |                        | <i>Urinary retention*</i>                                    |                                                                           |              |
| 35 |                        | <i>Nocturia*</i>                                             |                                                                           |              |
| 36 |                        | <i>Mobility*</i>                                             |                                                                           |              |

*\*Symptoms in italic not representative of the most common ADRs according to SPCs, but agreed by working group to be relevant to our patient population.*
